# Supplementary material for: Robust liquid-infused surfaces through patterned wettability
Source: Royal Society of Chemistry journal article supplement (doi:10.1039/c5sm00611b), 2015-01-01
Supplement: c5sm00611b1.pdf [file c5sm00611b1.pdf]

## Electronic Supplementary Information: Robust liquid-infused surfaces through patterned wettability

Wexler, Grosskopf, Chow, Fan, Jacobi, Stone

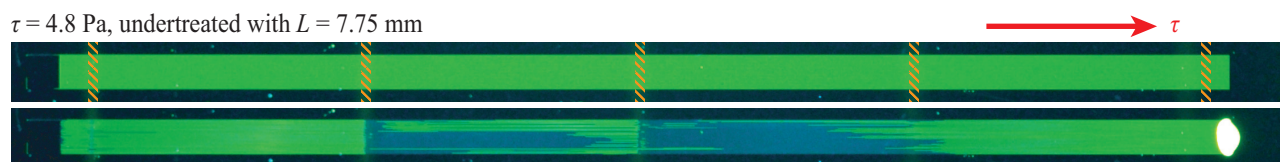

Figure 1: Planform view of a shear-driven drainage experiment conducted on an undertreated surface with fifty streamwise grooves. Oil fluoresces green, and the drained portions of the texture reflect the blue light used for excitation. White blobs indicate the presence of overflowing oil droplets. The top image shows the initial state, and the bottom image shows the steady state. The surface was treated under deep-UV light for 15 minutes instead of 30 minutes, resulting in only partial oil retention.
